# Supplementary material
Source: PubMed Central journal article supplement (PMC3634377)
Supplement: 10.3163.1536-5050.101.2.009.sg001.pdf [file 10.3163.1536-5050.101.2.009.sg001.pdf]

## Evaluation of health information outreach: theory, practice, and future direction

Wanda Whitney, PhD, MLS, AHIP; Gale A. Dutcher, MLS, MS, AHIP; Alla Keselman, PhD, MA

### APPENDIX

#### Articles analyzed

1. Blackwelder MB, Hanus K, Lemahieu L, Sieracki R. Increasing public awareness of quality health information on the Internet: does it make a difference? *J Consumer Health Internet*. 2003 Jan-Mar;7(1):51-8. DOI: [http://dx.doi.org/10.1300/J381v07n01\\_05](http://dx.doi.org/10.1300/J381v07n01_05).
2. Broering NC, Chauncey GA, Gomes SL. Outreach to public libraries, senior centers, and clinics to improve patient and consumer health care: an update. *J Consumer Health Internet*. 2006 Jul-Sep;10(3):1-19. DOI: [http://dx.doi.org/10.1300/J381v10n03\\_01](http://dx.doi.org/10.1300/J381v10n03_01).
3. Campbell RJ, Nolfi DA. Teaching elderly adults to use the Internet to access health care information: before-after study. *J Med Internet Res*. 2005 Jun 30;7(2):e19. DOI: <http://dx.doi.org/10.2196/jmir.7.2.e19>.
4. Charnock D, Shepperd S. Learning to DISCERN online: applying an appraisal tool to health websites in a workshop setting. *Health Educ Res*. 2004 Aug;19(4):440-6. DOI: <http://dx.doi.org/10.1093/her/cyg046>.
5. Chu A, Huber J, Mastel-Smith B, Cesario S. "Partnering with Seniors for Better Health": computer use and Internet health information retrieval among older adults in a low socioeconomic community. *J Med Lib Assoc*. 2009 Jan;97(1):12-20. DOI: <http://dx.doi.org/10.3163/1536-5050.97.1.003>.
6. Chu A, Mastel-Smith B. The outcomes of anxiety, confidence, and self-efficacy with Internet health information retrieval in older adults: a pilot study. *Comput Inform Nurs*. 2010 Jul-Aug;28(4):222-8. DOI: <http://dx.doi.org/10.1097/NCN.0b013e3181e1e271>.
7. D'Alessandro DM, Kreiter CD, Kinzer SL, Peterson MW. A randomized controlled trial of an information prescription for pediatric patient education on the Internet. *Arch Pediatr Adolesc Med*. 2004 Sep;158(9):857-62.
8. Flaherty MG, Roberts L. Rural outreach training efforts to clinicians and public library staff: NLM resource promotion. *J Consumer Health Internet*. 2009 Jan-Mar;13(1):14-30. DOI: <http://dx.doi.org/10.1080/15398280802674636>.
9. Gregg AL, Wozar JA, Wessel CB, Epstein BA. Designing a curriculum on Internet health resources for deaf high school students. *J Med Lib Assoc*. 2002 Oct;90(4):431-6.
10. Gross VA, Famiglio LM, Babish J. Senior citizen access to trusted stroke information: a blended approach. *J Consumer Health Internet*. 2007 Apr-Jun;11(2):1-11. DOI: [http://dx.doi.org/10.1300/J381v11n02\\_01](http://dx.doi.org/10.1300/J381v11n02_01).
11. Harger NE, Martin ER. The CATCH project: Central Mass Access to Child Health Information. *J Med Lib Assoc*. 2007 Jul;95(3):337-9. DOI: <http://dx.doi.org/10.3163/1536-5050.95.3.337>.
12. Helfner C. Brigham and Women's Hospital's consumer health database searching seminar series: the first year. *J Consumer Health Internet*. 2006 Apr-Jun;10(2):25-35. DOI: [http://dx.doi.org/10.1300/J381v10n02\\_03](http://dx.doi.org/10.1300/J381v10n02_03).

13. Henderson CL, Kelly DP, Swanson J, Welmaker RB, Arango XE. Project uncover health information databases: a collaboration to promote the use of National Library of Medicine consumer health databases. *J Consumer Health Internet*. 2009 Apr-Jun;13(2):135-42. DOI: <http://dx.doi.org/10.1080/15398280902896550>.
14. Henner T. An intergenerational approach to Internet training: student-led outreach to promote seniors' use of Internet health resources. *J Consumer Health Internet*. 2009 Oct-Dec;13(4):334-46. DOI: <http://dx.doi.org/10.1080/15398280903340822>.
15. Hoffman-Goetz L, Friedman DB, Celestine A. Evaluation of a public library workshop: teaching older adults how to search the Internet for reliable cancer information. *J Consumer Health Internet*. 2006 Jul-Sep;10(3):29-43. DOI: [http://dx.doi.org/10.1300/J381v10n03\\_03](http://dx.doi.org/10.1300/J381v10n03_03).
16. Huber JT, Peek KE, Hughes LA, Little F. Woman to woman: community health information project. *J Med Lib Assoc*. 2003 Oct;91(4):404-10.
17. Huber JT, Varman B. F2F connection: a community outreach partnership project. *J Consumer Health Internet*. 2006;10(4):27-32. DOI: [http://dx.doi.org/10.1300/J381v10n04\\_03](http://dx.doi.org/10.1300/J381v10n04_03).
18. Huber JT, Varman B. Informing neighborhood health: a health information outreach project targeting community clinics. *J Consumer Health Internet*. 2006 Apr-Jun;10(2):37-45. DOI: [http://dx.doi.org/10.1300/J381v10n02\\_04](http://dx.doi.org/10.1300/J381v10n02_04).
19. Huber JT, Varman B. Project St. Hope: an AIDS community information outreach project. *J Consumer Health Internet*. 2008 Oct-Dec;12(4):327-36. DOI: <http://dx.doi.org/10.1080/15398280802451555>.
20. Huber JT, Walsh TJ, Varman B. Camp for all connection: a community health information outreach project. *J Med Lib Assoc*. 2005 Jul;93(3):348-52.
21. Leaffer T, Gonda B. The Internet: an underutilized tool in patient education. *Comput Nurs*. 2000 Jan-Feb;18(1):47-52.
22. Masi CM, Suarez-Balcazar Y, Cassey MZ, Kinney L, Piotrowski ZH. Internet access and empowerment: a community-based health initiative. *J Gen Intern Med*. 2003 Jul;18(7):525-30. DOI: <http://dx.doi.org/10.1046/j.1525-1497.2003.20344.x>.
23. Olney CA, Warner DG, Reyna G, Wood FB, Siegel ER. MedlinePlus and the challenge of low health literacy: findings from the Colonias project. *J Med Lib Assoc*. 2007 Jan;95(1):31-9.
24. Perocchia RS, Rapkin B. Bridging the digital divide project: providing access to cancer information through the Internet. *Electron J Commun [Internet]*. 2001;11(3-4):1-19 [cited 15 May 2012]. <<http://www.cios.org/EJCPUBLIC/011/3/01133.HTML>>.
25. Rankins J, Kirksey O, Bogan Y, Brown B. Impact of a low-intensity pedagogical model for integrating MedlinePlus exercises into middle school nutrition lessons. *J Med Lib Assoc*. 2007 Oct;95(4):388-93. DOI: <http://dx.doi.org/10.3163/1536-5050.95.4.388>.
26. Rieke JL. Linking Native Americans to quality health information on the Internet: a tribal college library collaboration. *J Consumer Health Internet*. 2005 Apr-Jun;9(2):27-42. DOI: [http://dx.doi.org/10.1300/J381v09n02\\_03](http://dx.doi.org/10.1300/J381v09n02_03).
27. Schilling K, Harzbecker JJ, Ginn DS, Stevens RA. The development of a public-private partnership to improve HIV/AIDS consumers' access to quality health information. *J Consumer Health Internet*. 2004 Jul-Sep;8(3):17-33. DOI: [http://dx.doi.org/10.1300/J381v08n03\\_02](http://dx.doi.org/10.1300/J381v08n03_02).
28. Schwartz DG, Mosher E, Wilson S, Lipkus C, Collins R. Seniors connect. *Med Ref Serv Q*. 2002 Fall;21(3):1-19. DOI: [http://dx.doi.org/10.1300/J115v21n03\\_01](http://dx.doi.org/10.1300/J115v21n03_01).

29. Susic J. NIH Senior Health classes for senior citizens at a public library in Louisiana. *J Consumer Health Internet*. 2009 Oct–Dec;13(4):417–9. DOI: <http://dx.doi.org/10.1080/15398280903341226>.
30. Trettin LD, May JC, McKeehan NC. Teaching teens to “Get Net Smart for Good Health”: comparing interventions for an Internet training program. *J Med Lib Assoc*. 2008 Oct;96(4):370–4. DOI: <http://dx.doi.org/10.3163/1536-5050.96.4.013>.
31. Tse MMY, Choi KCY, Leung RSW. E-health for older people: the use of technology in health promotion. *Cyberpsychology Behav*. 2008 Aug;11(4):475–9. DOI: <http://dx.doi.org/10.1089/cpb.2007.0151>.
32. Warner DG, Olney CA, Wood FB, Hansen L, Bowden VM. High school peer tutors teach MedlinePlus: a model for Hispanic outreach. *J Med Lib Assoc*. 2005 Apr;93(2):243–52.
33. Xie B, Bugg JM. Public library computer training for older adults to access high-quality Internet health information. *Lib Inf Sci Res*. 2009 Sep;31(3):155–62. DOI: <http://dx.doi.org/10.1016/j.lisr.2009.03.004>.
