# Supplementary material
Source: PubMed Central journal article supplement (PMC3634377)
Supplement: 10.3163.1536-5050.101.2.009.sg002.pdf [file 10.3163.1536-5050.101.2.009.sg002.pdf]

**Evaluation of health information outreach: theory, practice, and future direction**

**Wanda Whitney, PhD, MLS, AHIP; Gale A. Dutcher, MLS, MS, AHIP; Alla Keselman, PhD, MA**

**Table 1**  
Coding scheme

| <b>Category</b>                | <b>Subcategories</b>                                                                                                                                                                                                                                                                               |
|--------------------------------|----------------------------------------------------------------------------------------------------------------------------------------------------------------------------------------------------------------------------------------------------------------------------------------------------|
| Theoretical framework          | Framework name<br>Framework absent                                                                                                                                                                                                                                                                 |
| Program characteristics        | Funding source<br>Target population<br>Setting<br>Pre-assessment (review of the site and its clients' needs)                                                                                                                                                                                       |
| Program goals                  | Immediate (as reported)<br>Long-range (as reported)                                                                                                                                                                                                                                                |
| Key program activities         | Providing computer and Internet access<br>Computer skills training<br>Information-seeking skills training<br>Promoting awareness about specific resources<br>In-depth training in using specific resources<br>Information evaluation skills training                                               |
| Activities' characteristics    | Number of sessions received by each participant<br>Length of session<br>Type of activity <ul style="list-style-type: none"> <li>• lecture/presentation</li> <li>• demonstration</li> <li>• hands-on learning</li> </ul> Number of participants                                                     |
| Measures                       | Computer or Internet usage<br>Self-efficacy and values<br>Information-seeking skills<br>Awareness/knowledge of specific resources<br>Information-evaluation skills<br>Knowledge of health content<br>Information behaviors<br>Health behaviors<br>Health outcomes<br>Institutional change<br>Other |
| Methodological characteristics | Approach <ul style="list-style-type: none"> <li>• qualitative</li> <li>• quantitative</li> </ul>                                                                                                                                                                                                   |

| <b>Category</b>                                       | <b>Subcategories</b>                                                                                                                        |
|-------------------------------------------------------|---------------------------------------------------------------------------------------------------------------------------------------------|
|                                                       | Data collection methods                                                                                                                     |
|                                                       | <ul style="list-style-type: none"><li>• surveys</li><li>• focus groups</li><li>• interviews</li><li>• etc.</li></ul>                        |
|                                                       | Quantitative attributes                                                                                                                     |
|                                                       | <ul style="list-style-type: none"><li>• Assessment time</li><li>– pretest</li><li>– immediate posttest</li><li>– delayed posttest</li></ul> |
| Findings                                              | Improvement                                                                                                                                 |
|                                                       | Statistical significance                                                                                                                    |
| Match between stated objectives and reported outcomes | Full match                                                                                                                                  |
|                                                       | Partial match                                                                                                                               |
|                                                       | No match                                                                                                                                    |
| Outcomes                                              | Judgment of the overall success (as reported)                                                                                               |
|                                                       | Judgment of the overall success (as perceived by us)                                                                                        |
|                                                       | Sustainability indicators (as reported)                                                                                                     |
|                                                       | Success enablers (as reported)                                                                                                              |
|                                                       | Success barriers (as reported)                                                                                                              |
|                                                       | Evaluation barriers (as reported)                                                                                                           |
